# Supplementary material for: Branched polyaniline/molybdenum oxide organic/inorganic heteronanostructures: synthesis and electromagnetic absorption properties
Source: Royal Society of Chemistry journal article supplement (doi:10.1039/c3ta11591g), 2013-01-01
Supplement: c3ta11591g.pdf [file c3ta11591g.pdf]

Branched Polyaniline/Molybdenum oxide organic/Inorganic  
Heterostructures: Synthesis and Electromagnetic Absorption  
properties

**Qingshan Wang,<sup>a</sup> Zhenyu Lei,<sup>a</sup> Yujin Chen,<sup>\*a</sup> Qiuyun Ouyang,<sup>a</sup> Peng Gao,<sup>\*b</sup> Lihong Qi,<sup>a</sup> Chunling Zhu,<sup>\*b</sup> and Jianzhong Zhang<sup>a</sup>**

<sup>a</sup> Key Laboratory of In-Fiber Integrated Optics of Ministry of Education, College of  
Science, Harbin Engineering University

<sup>b</sup> College of Material Science and Chemical Engineering, Harbin Engineering  
University.

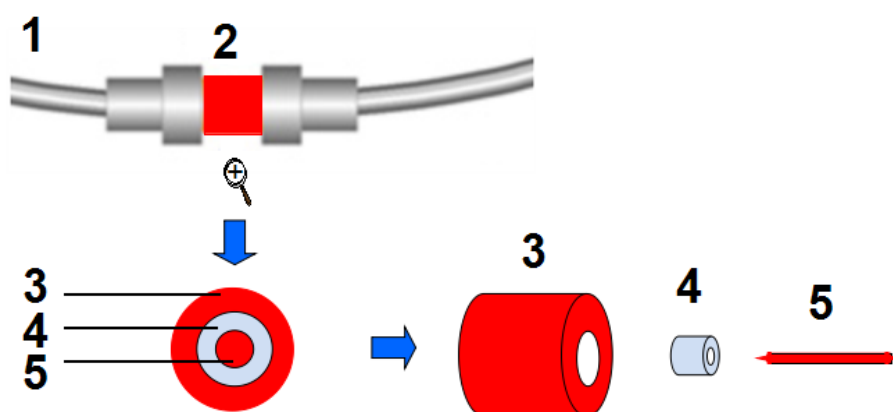

**Figure S1.** The illustration for test system. (1) coaxial cable, (2) test chamber, (3), (4) and (5) cross section of the test chamber: (3) out copper conductor, (4) test sample, (5) inner copper conductor.

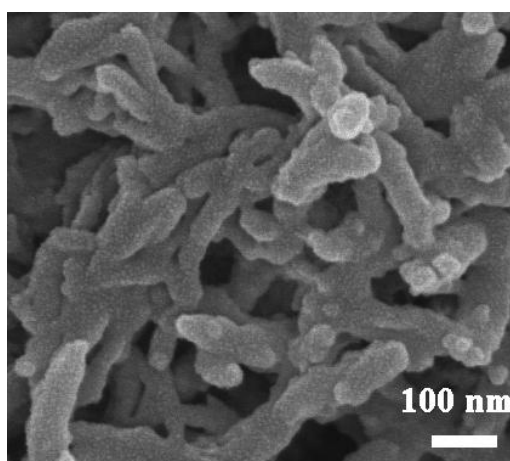

**Figure S2** SEM image of PANI nanorods.

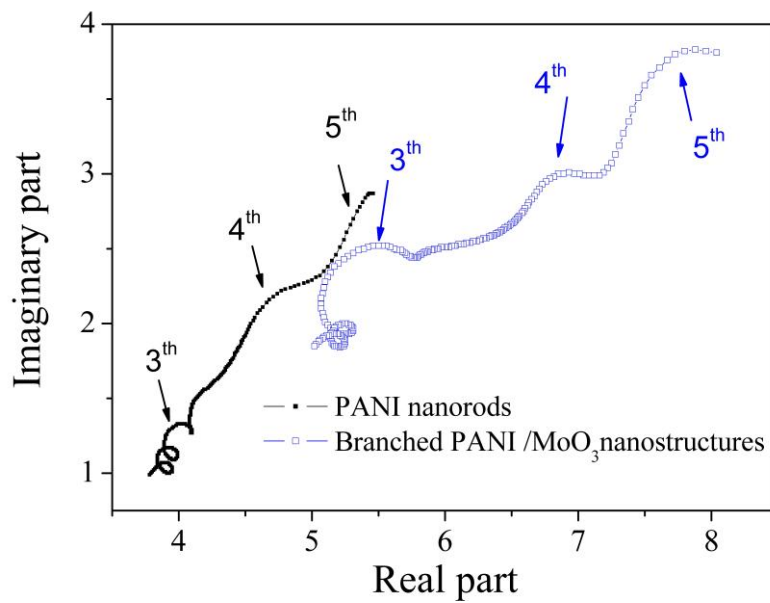

**Figure S3** Cole-Cole semicircles for the PANI nanorods and the branched PANI/MoO<sub>3</sub> nanostructures.
